# Supplementary material for: From the Field to the Pot: Phytochemical and Functional Analyses of Calendula officinalis L. Flower for Incorporation in an Organic Yogurt
Source: Antioxidants (Basel). 2019 Nov 15;8(11):559. doi: 10.3390/antiox8110559 (PMC6912323; doi:10.3390/antiox8110559)
Supplement: Supplementary file 1 [file antioxidants-08-00559-s001.pdf]

## SUPPLEMENTARY MATERIAL

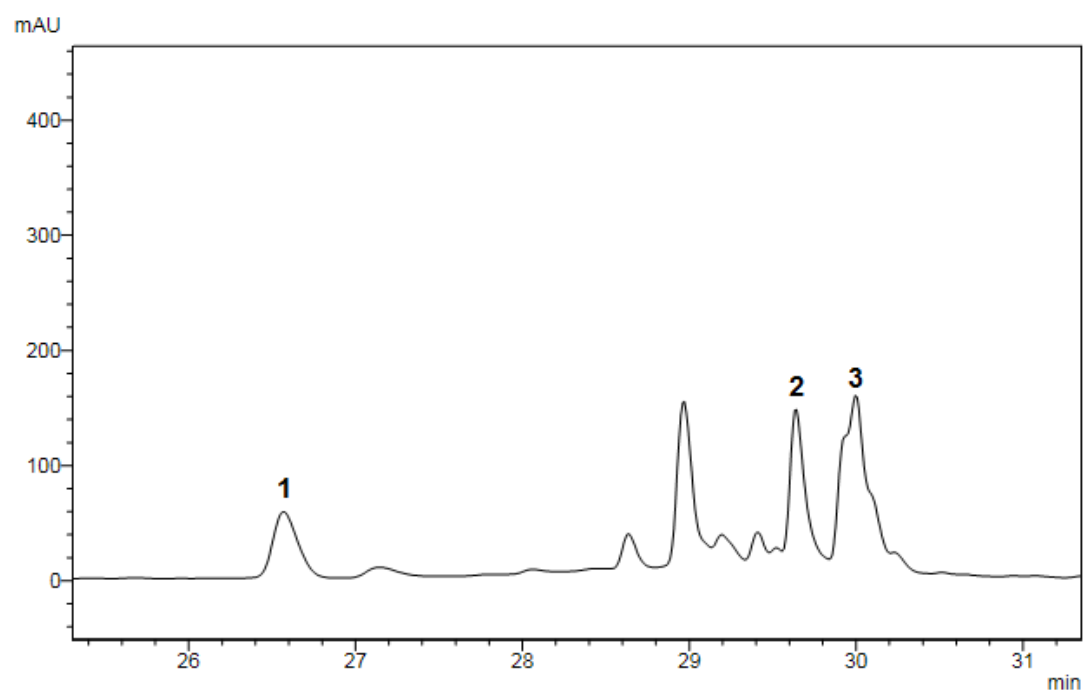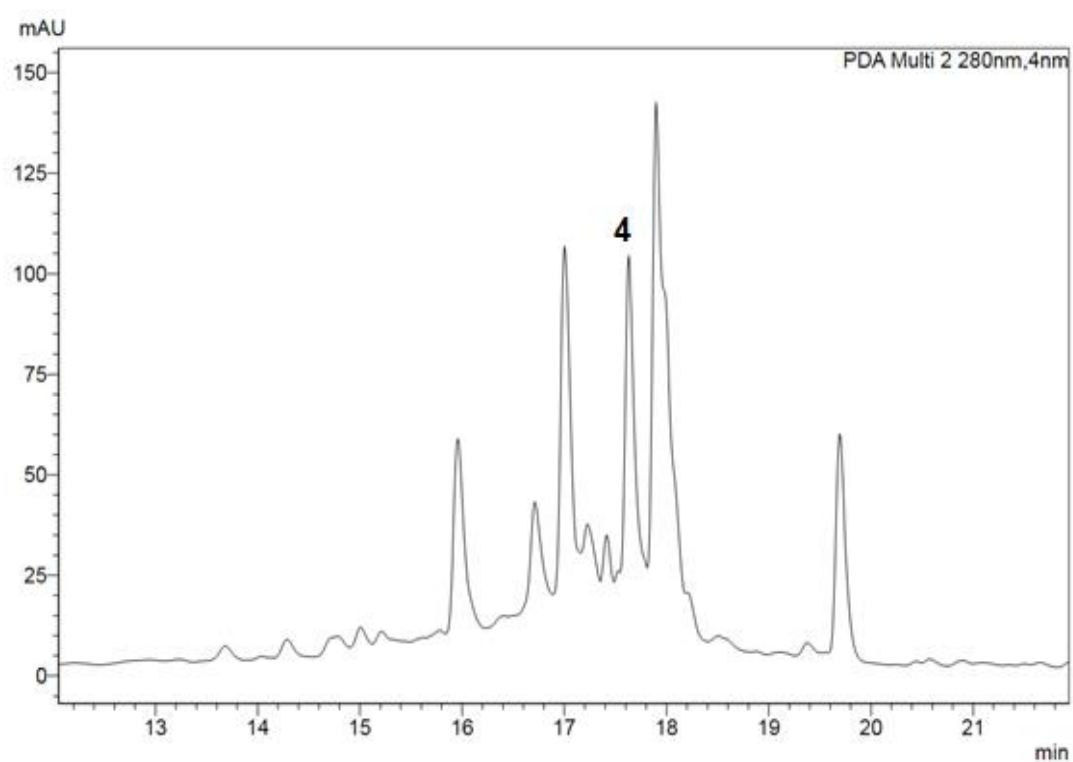

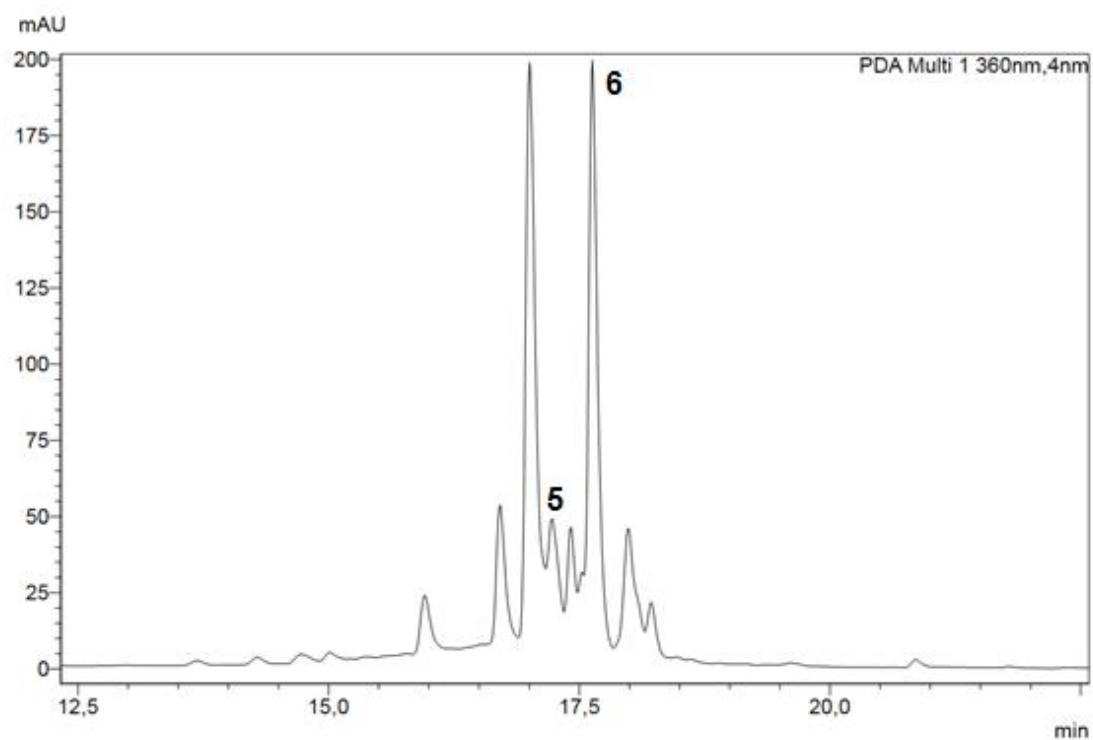

**Figure S1.** HPLC-DAD chromatogram of the *C. officinalis* flower extracted with water and ethyl alcohol (50:50 v/v): 1 = caffeic acid, 2 = *p*-coumaric acid, 3 = ferulic acid, 4 = procyanidin A2, 5 = quercetin-3-rutinoside, and 6 = ellagic acid.

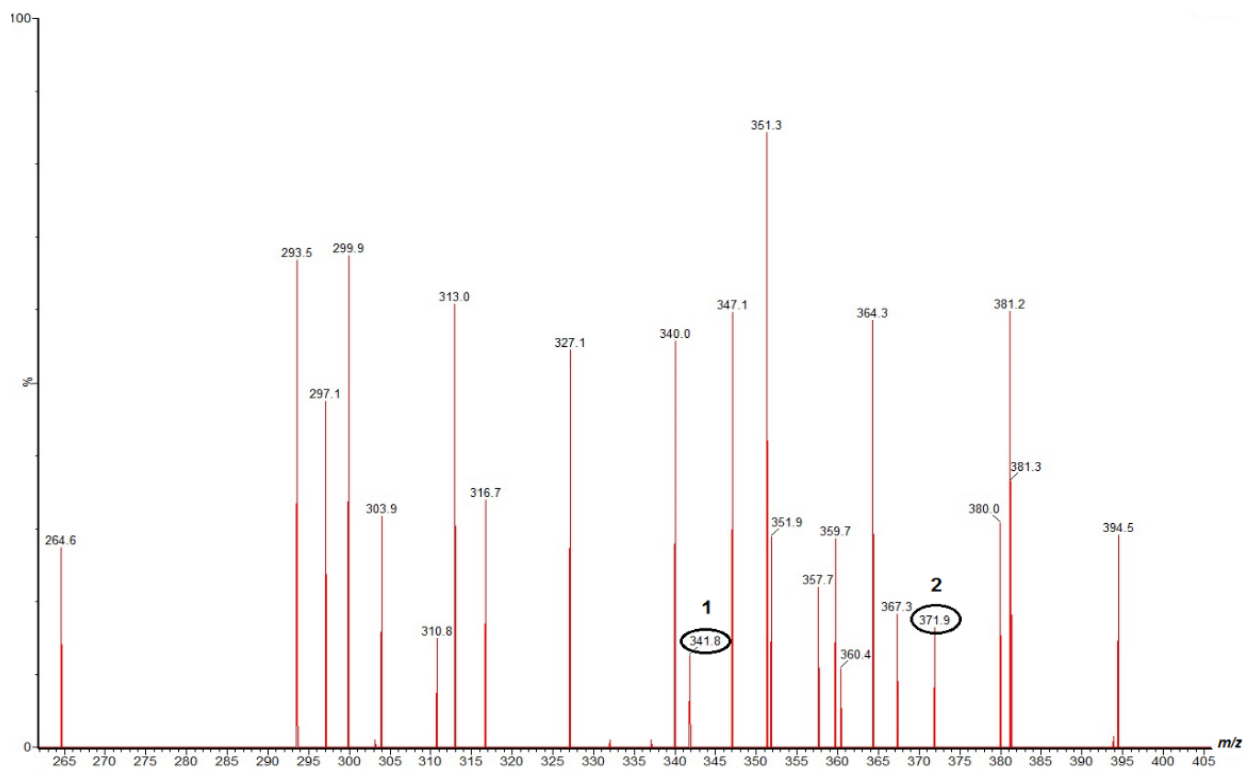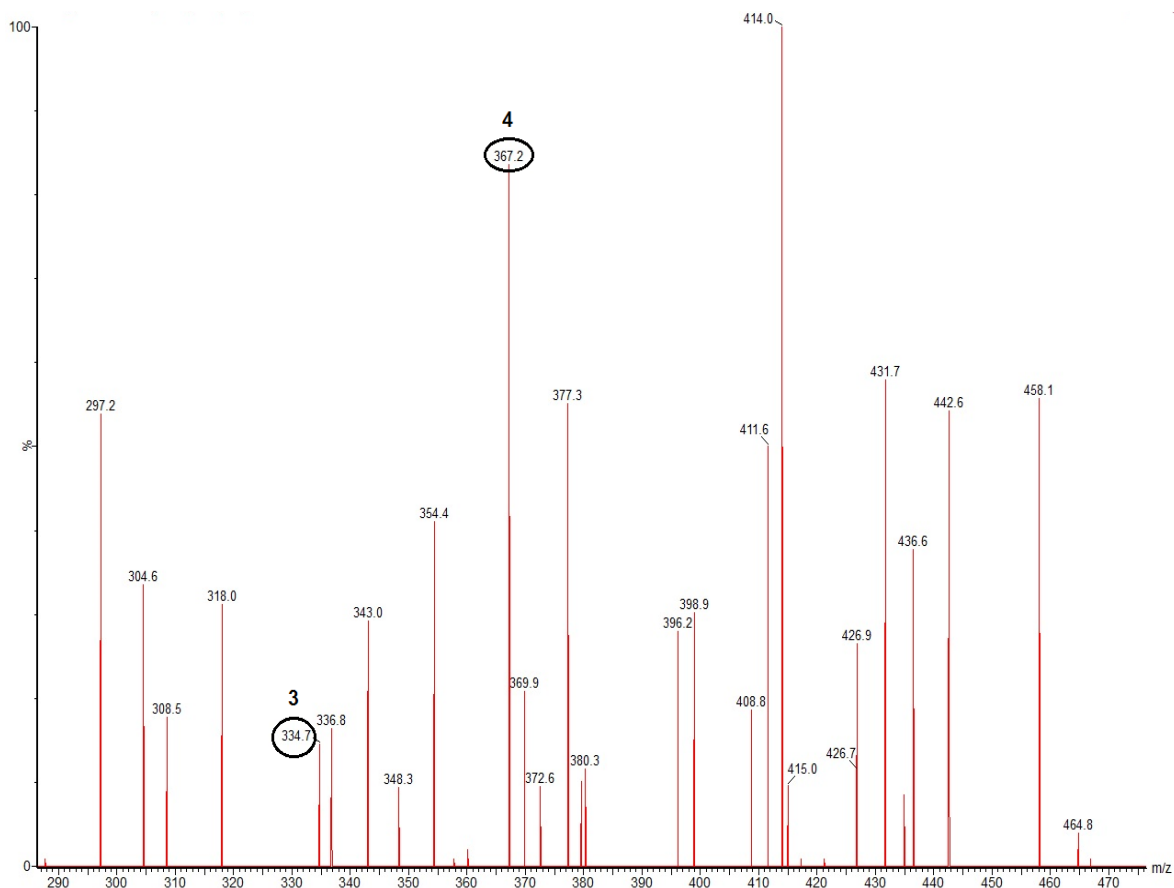

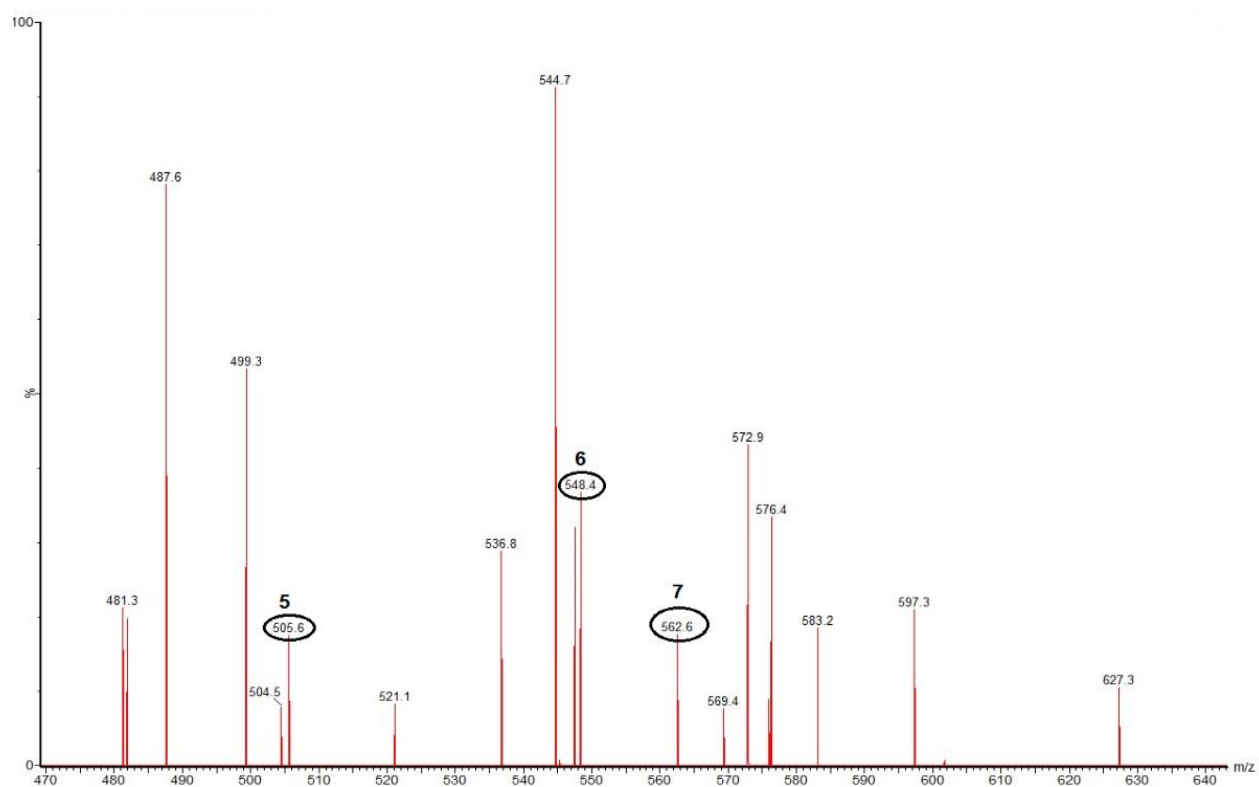

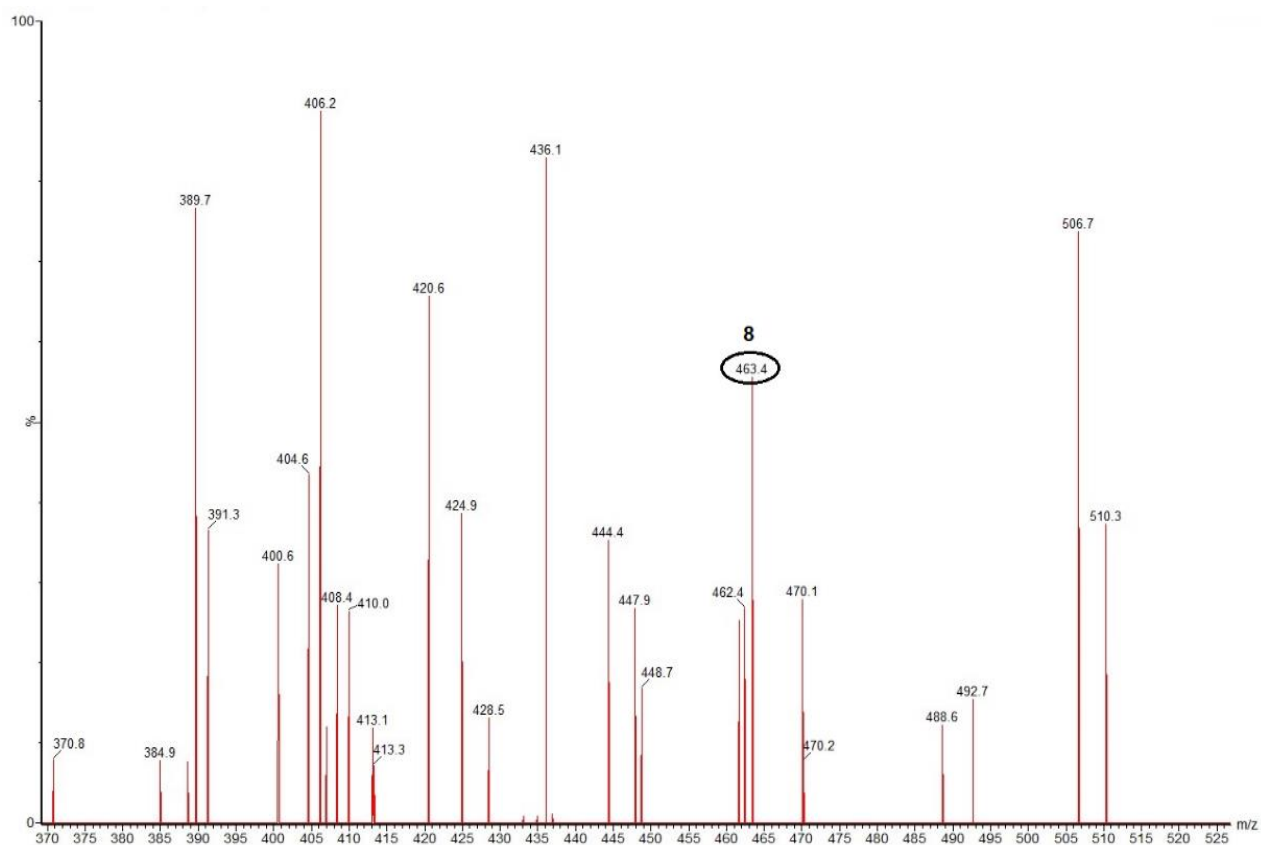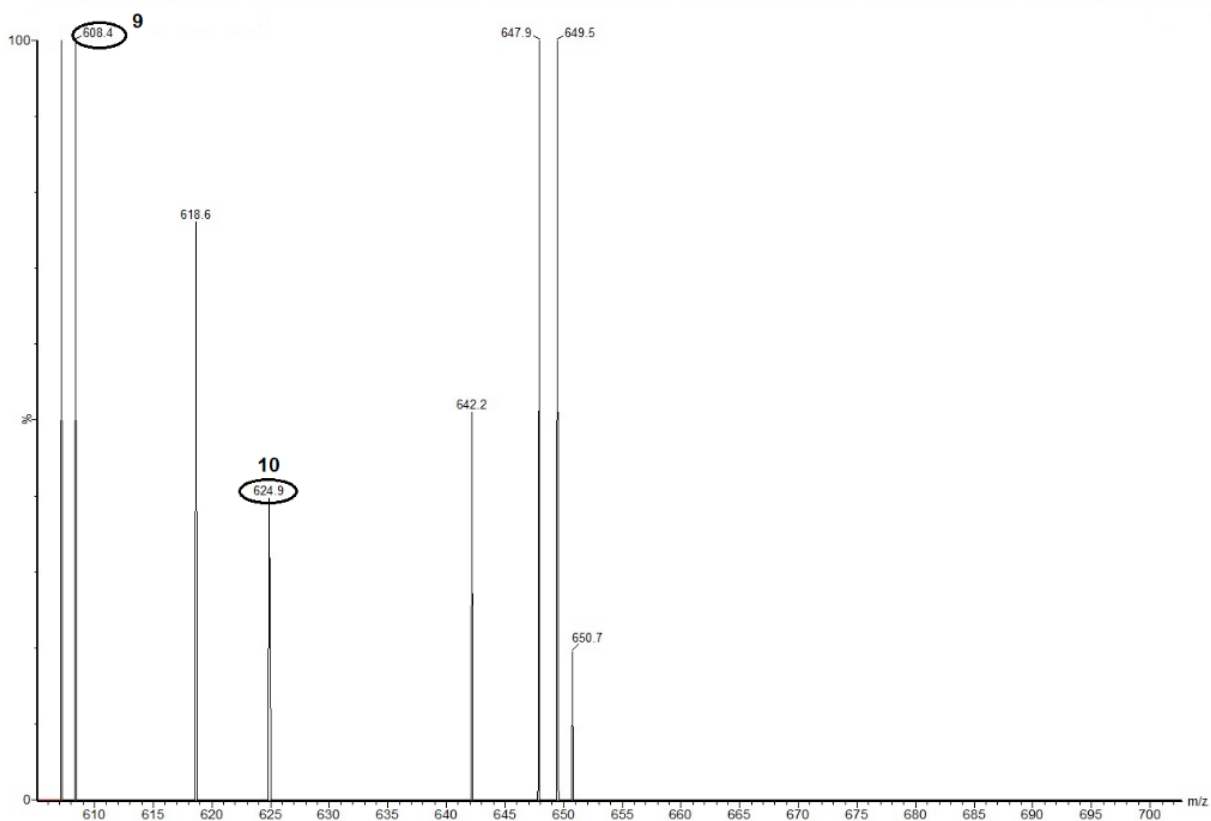

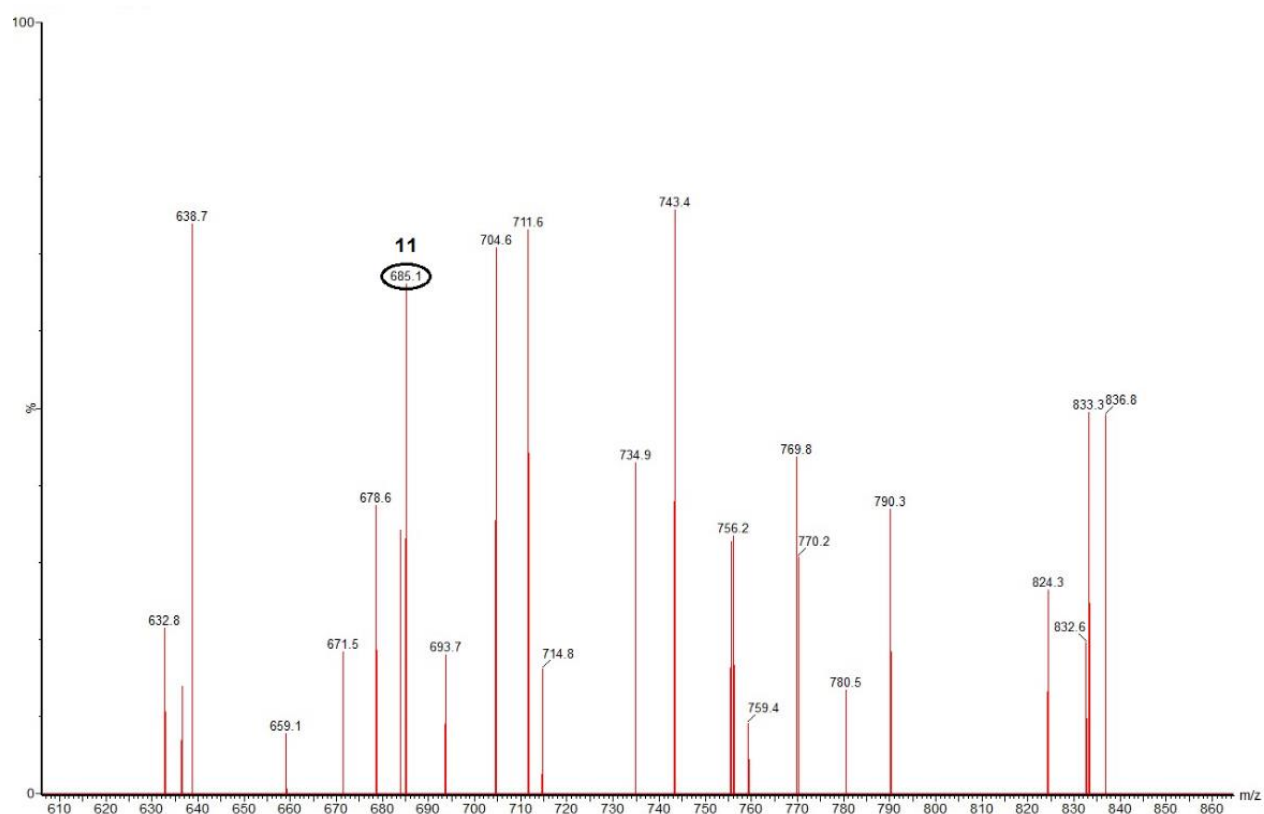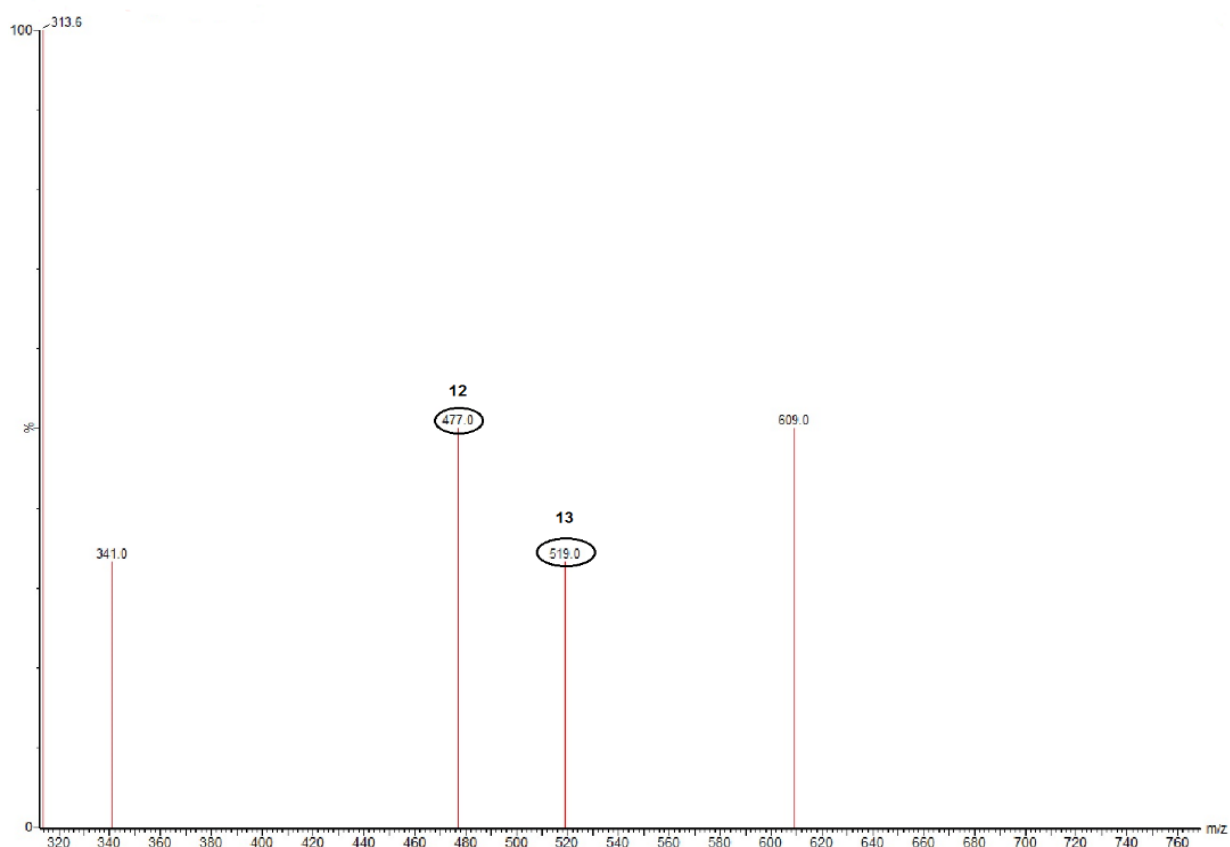

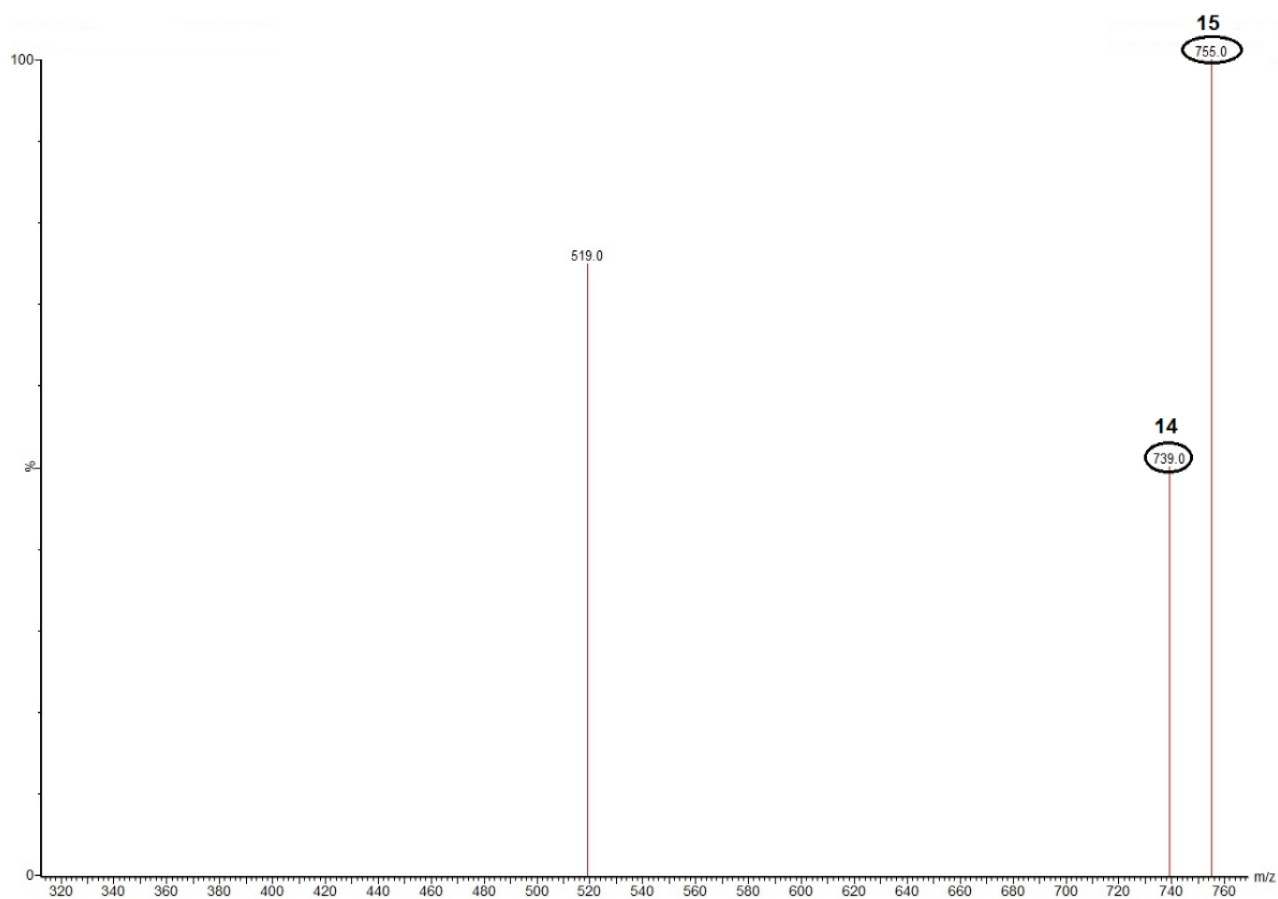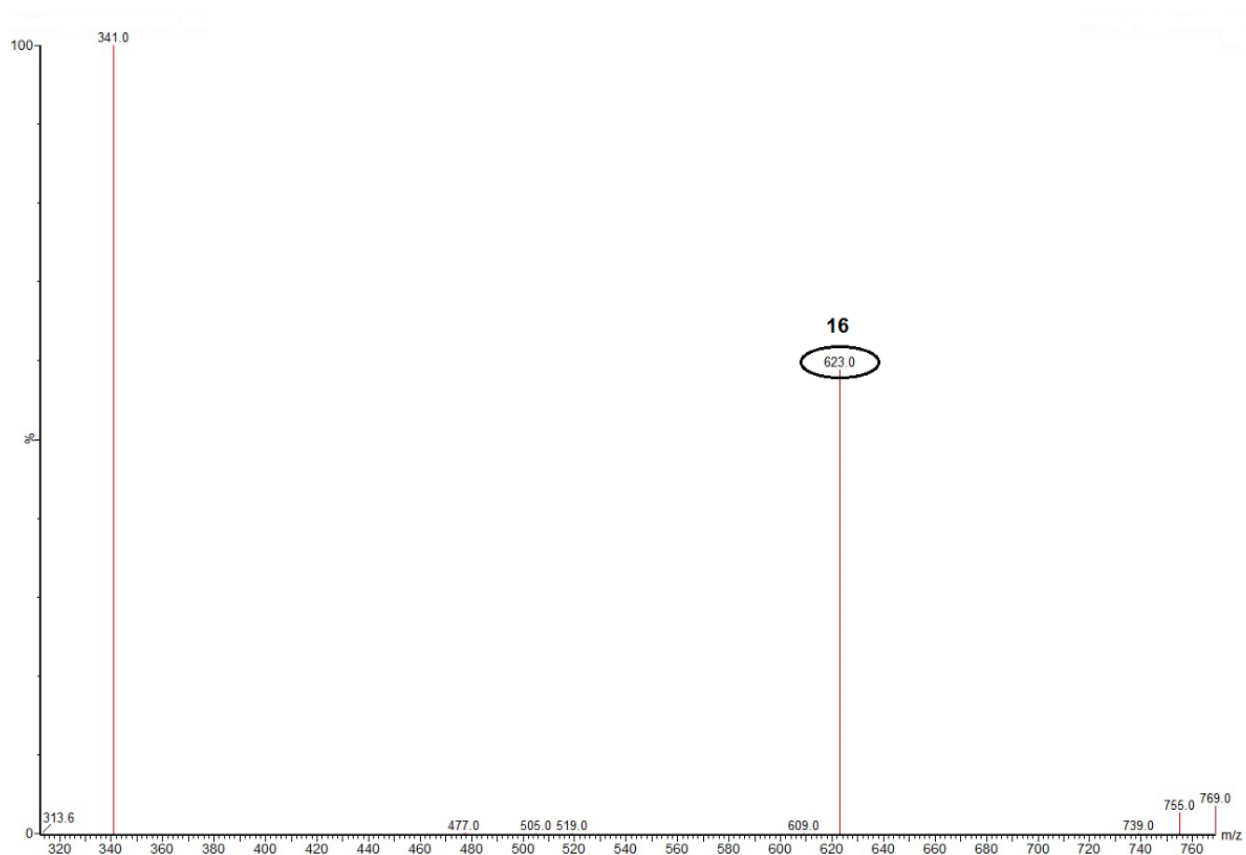

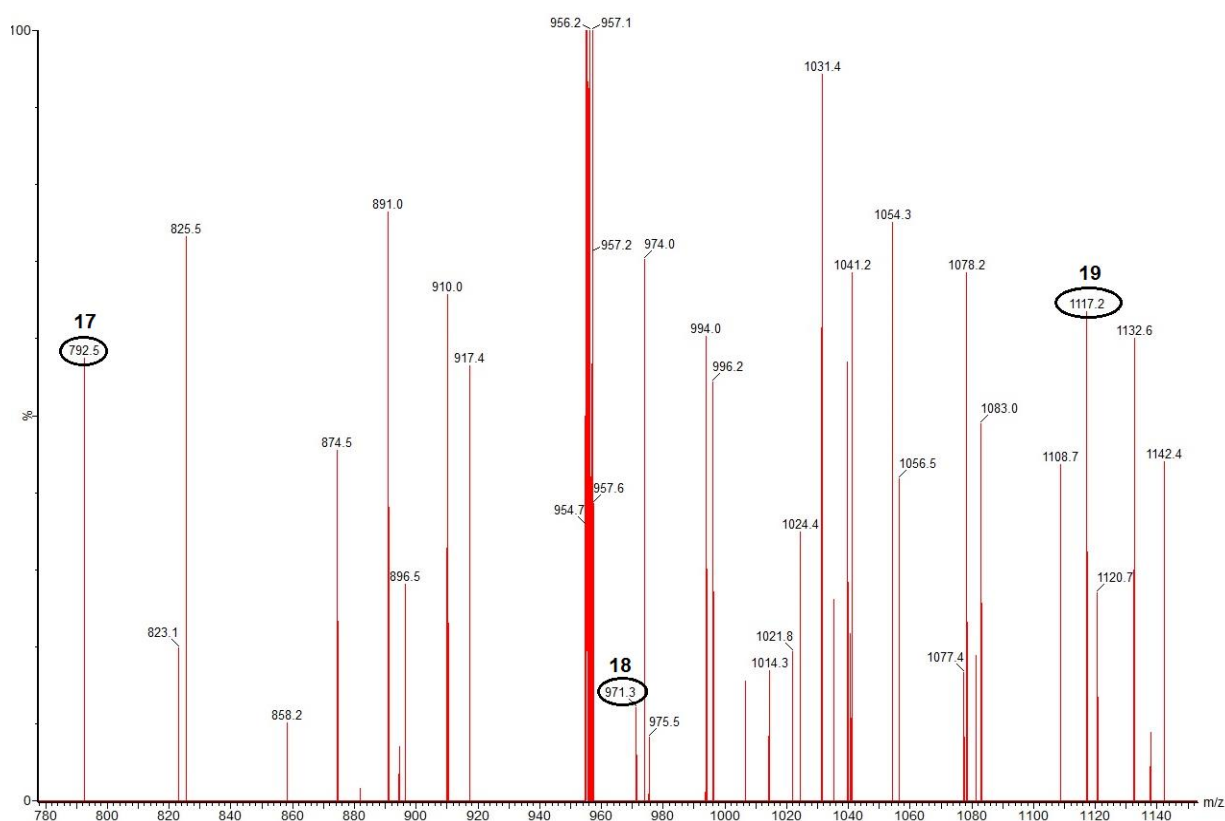

**Figure S2.** ESI-MS/MS chromatogram of the *C. officinalis* flower extracted with water and ethyl alcohol (50:50 v/v) and the tentative identification of phenolic compounds. Note: **1** = caffeic acid hexoside ( $m/z$  341), **2** = isomeric form of hydroxyferulic acid hexoside ( $m/z$  371), **3** = caffeoylshikimic acid ( $m/z$  335), **4** = 5-*O*-feruloylquinic acid ( $m/z$  367), **5** = quercetin derivative ( $m/z$  505), **6** = quercetin-3-*O*-malonylhexoside ( $m/z$  549), **7** = apigenin derivative ( $m/z$  563), **8** = quercetin derivative ( $m/z$  463), **9** = quercetin derivative ( $m/z$  609), **10** = quercetin dihexoside ( $m/z$  625), **11** = ligstroside hexoside ( $m/z$  685), **12** = isorhamnetin derivative ( $m/z$  477), **13** = isorhamnetin derivative ( $m/z$  519), **14** = kaempferol-rhamnosylrutinoside ( $m/z$  739), **15** = quercetin-3-*O*-rhamnosylrutinoside ( $m/z$  755), **16** = isorhamnetin derivative ( $m/z$  623), **17** = calendulose G ( $m/z$  793), **18** = calendasaponin B ( $m/z$  971), **19** = calendasaponin A ( $m/z$  1117). Comparison with the reported MS/MS data obtained by Miguel et al. [44] and Faustino et al. [45].
